# Supplementary material for: Electrochemical immunoassay platform for high sensitivity protein detection based on redox-modified carbon nanotube labels
Source: Royal Society of Chemistry journal article supplement (doi:10.1039/c1an15079k), 2011-01-01
Supplement: c1an15079k.pdf [file c1an15079k.pdf]

Electrochemical Immunoassay Platform for High Sensitivity Protein  
Detection Based On Redox-Modified Carbon Nanotube Labels

Wilanee Chunglok, Porntip Khownarumit, Patsamon Rijivaranich, Mithran  
Somasundrum, Weresak Surrareungchai

SUPPORTING INFORMATION

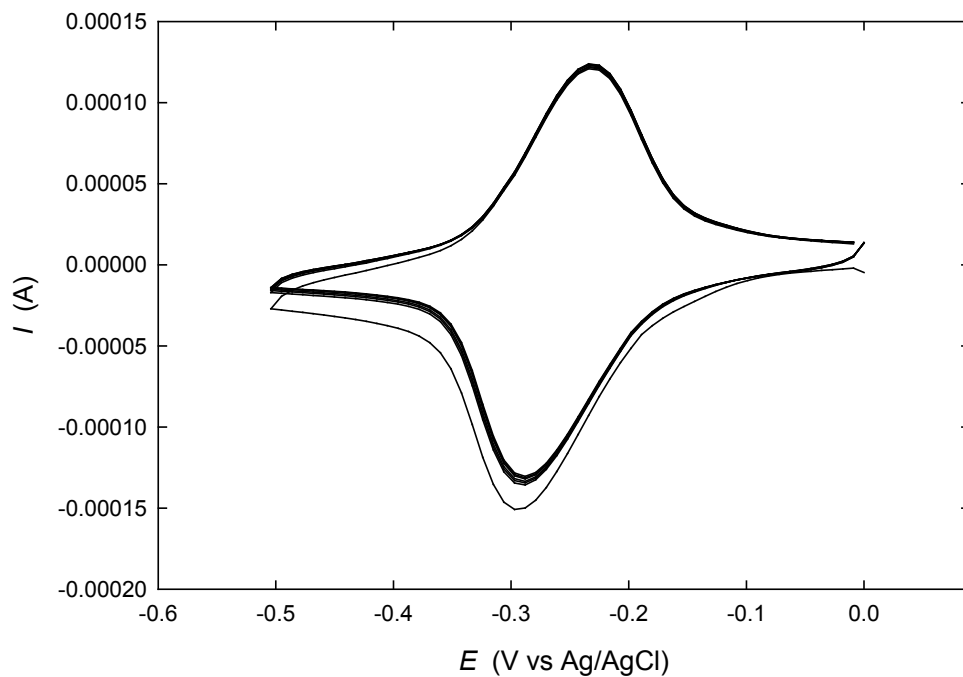

**Figure S-1** Cyclic voltammograms of glassy carbon electrode modified by MB-MWNTs, electrode loading as in Figure 2. 1st, 5th, 10th, 20th, 50th, 70th and 100th scans are shown superimposed. Scan rate =  $50 \text{ mV s}^{-1}$ . Electrolyte = 0.1 M phosphate buffer, pH 7.0 + 0.1 M KCl. In terms of stability, similar characteristics have been observed during repeated CVs of glassy carbon modified by single walled carbon nanotubes coated with MB<sup>1</sup>

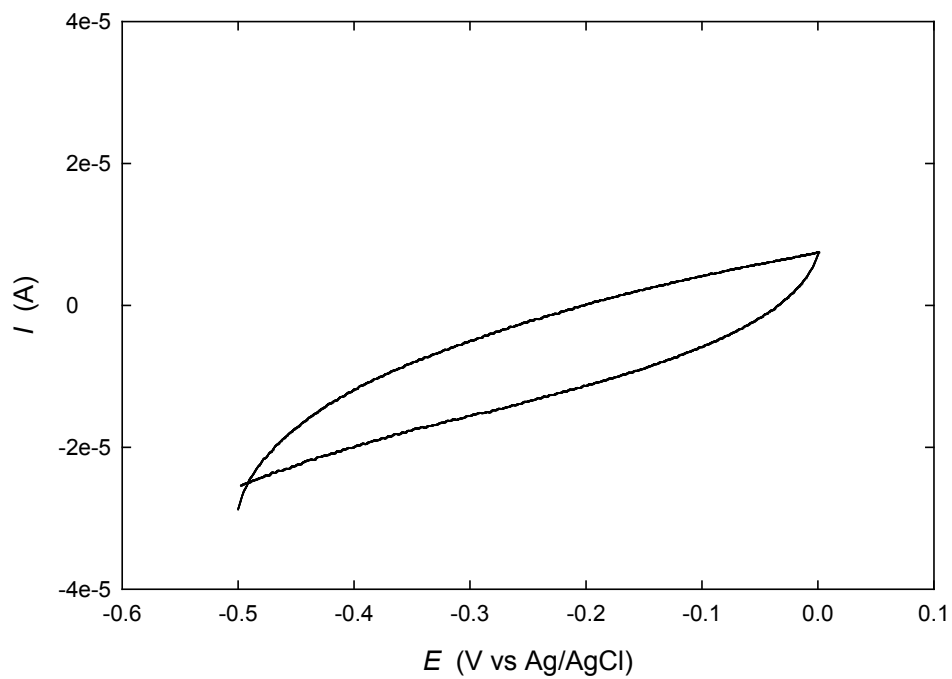

**Figure S-2** Cyclic voltammogram of glassy carbon electrode modified by MB-free MWNTs, nanotube loading on electrode as in Figure 2. Scan rate and electrolyte as in Figure S-1.

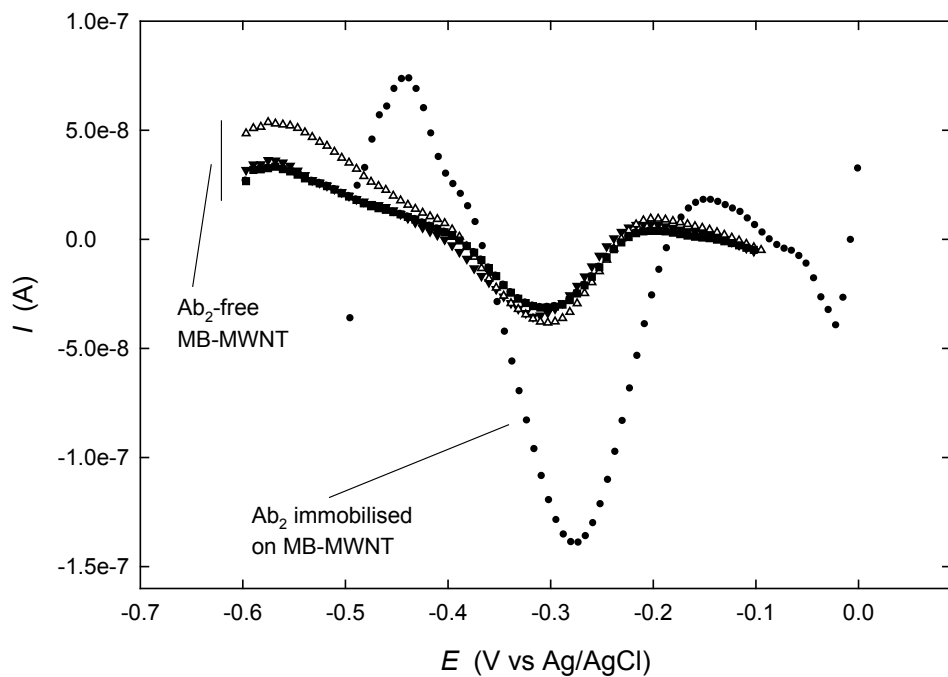

**Figure S-3** Example of DPV used for the calibration curve in Fig. 5 at 10 pg/mL mouse IgG (filled circles) and four DPVs recorded at the same mouse IgG concentration using Ab<sub>2</sub>-free MB-MWNT adducts. All DPVs were baseline corrected using the GPES software of the Autolab.

1. R. Palangsuntikul, M. Somasundrum and W. Surareungchai, *Electrochim. Acta*, 2010, **56**, 470.
